# Supplementary material for: A Li–O2 battery cathode with vertical mass/charge transfer pathways
Source: Royal Society of Chemistry journal article supplement (doi:10.1039/c9ta00017h), 2019-01-01
Supplement: c9ta00017h1.pdf [file c9ta00017h1.pdf]

**Supplementary Information**

**A Li-O<sub>2</sub> battery cathode with vertical mass/charge transfer  
pathways**

*Zhaoming Huang,<sup>a</sup> Zhe Deng,<sup>a</sup> Yue Shen,<sup>\*a</sup> Wanqi Chen,<sup>a</sup> Wei Liu,<sup>ab</sup> Meilan Xie,<sup>a</sup> Yankai Li<sup>a</sup>  
and Yunhui Huang<sup>\*a</sup>*

<sup>a</sup> State Key Laboratory of Material Processing and Die & Mould Technology, School of Materials Science and Engineering, Huazhong University of Science and Technology, Wuhan, Hubei 430074, China.

<sup>b</sup> Hubei Collaborative Innovation Center for Advanced Organic Chemical Materials, Ministry-of-Education Key Laboratory for Synthesis and Applications of Organic Functional Molecules, Hubei University, Wuhan 430062, China.

\* Corresponding author.

E-mail address: [huangyh@hust.edu.cn](mailto:huangyh@hust.edu.cn); [shenyue1213@hust.edu.cn](mailto:shenyue1213@hust.edu.cn)

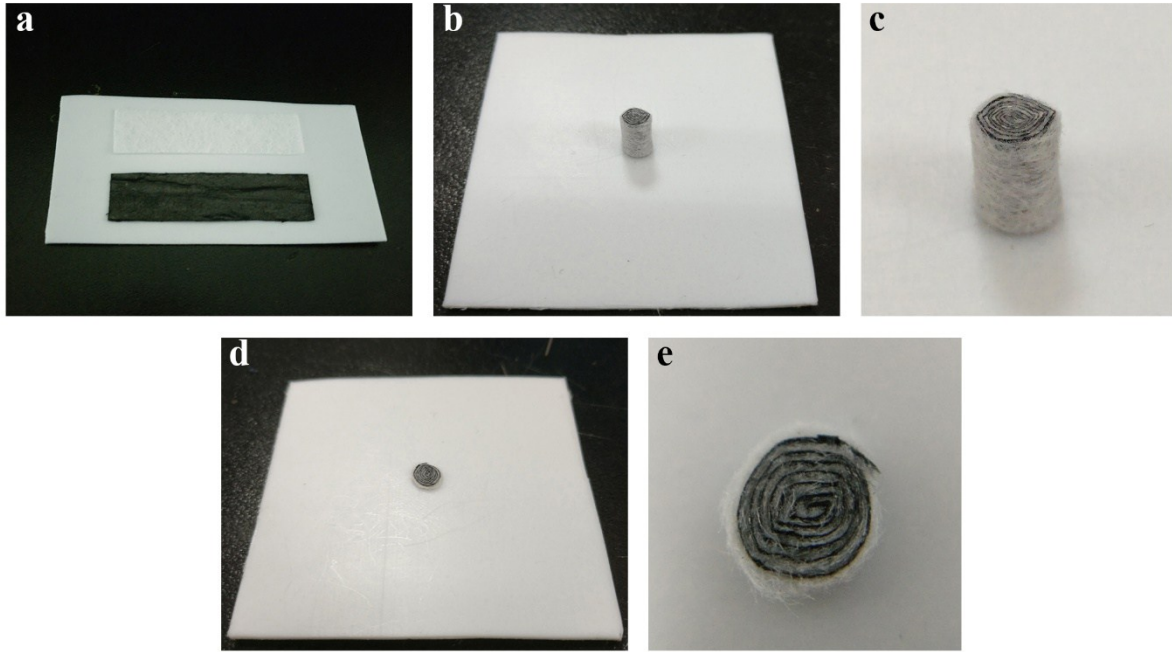

**Fig. S1** (a) Raw materials including thin cotton piece and CNT film; (b, c) As-rolled cylinder and corresponding amplified image; (d, e) Finally cathode (before gelation) and corresponding amplified image.

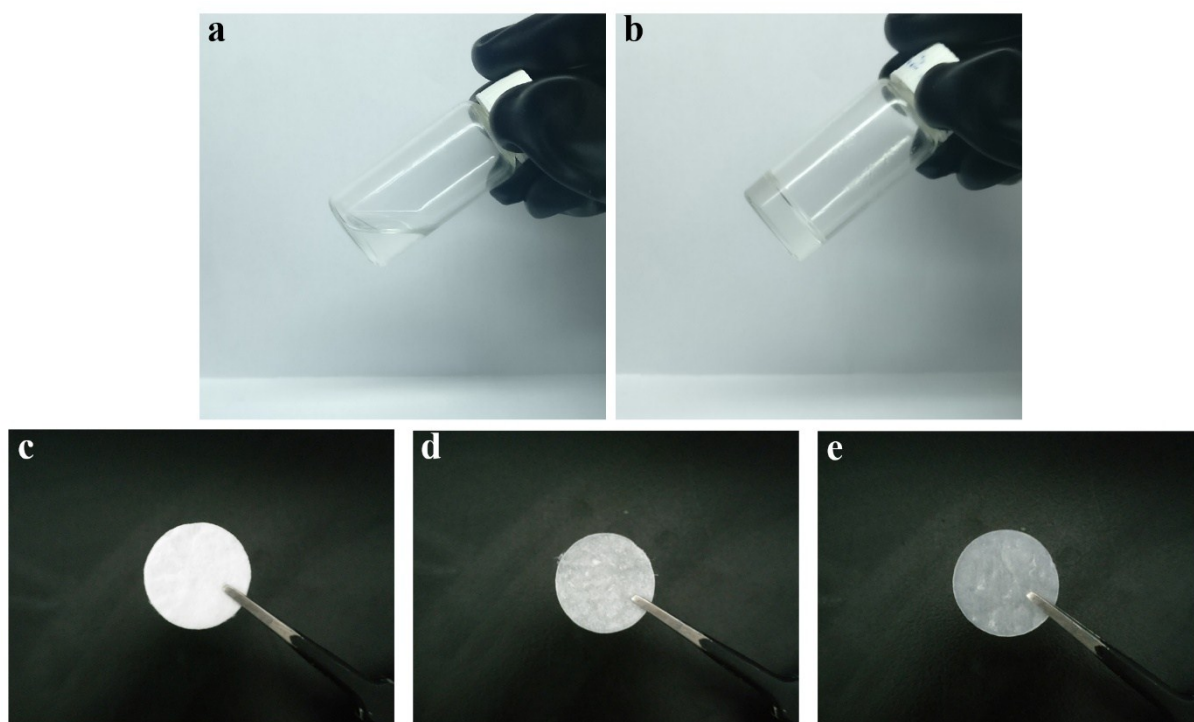

**Fig. S2** (a) Precursor solution of gel polymer electrolytes (GPEs) before heating; (b) Solidified gel after heating at 80 °C for overnight; (c-e) Photographs of (c) pristine glass fiber, (d) GPE and (e) LE.

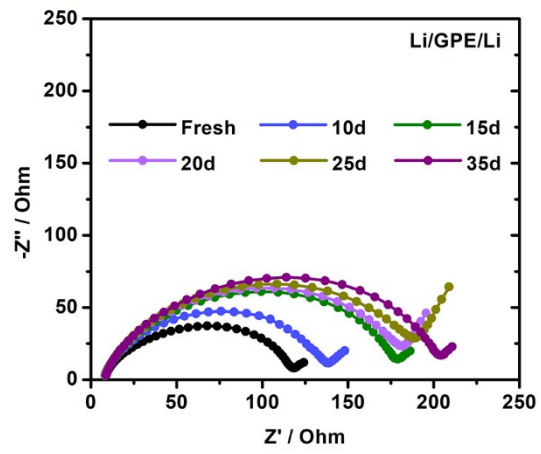

**Fig. S3** Evolution of interfacial resistance of symmetrical Li/GPE/Li cell with the lapse of time.

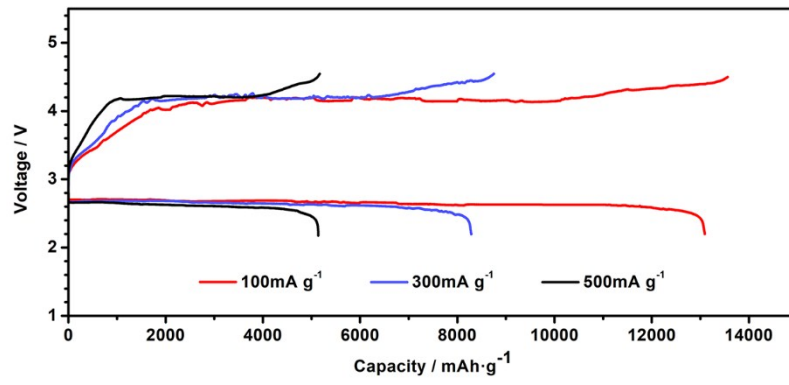

**Fig. S4** The full discharge-charge curves of the cell with R-CNT + GPE cathode at different current densities.

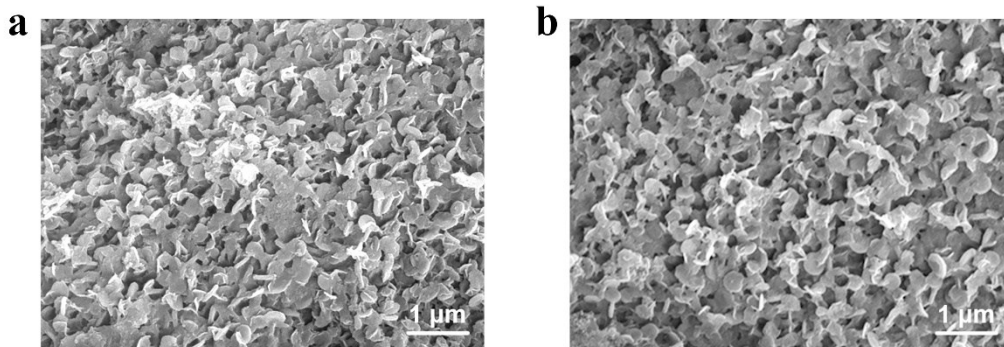

**Fig. S5** SEM images on both sides of the R-CNT + GPE cathode after discharge.

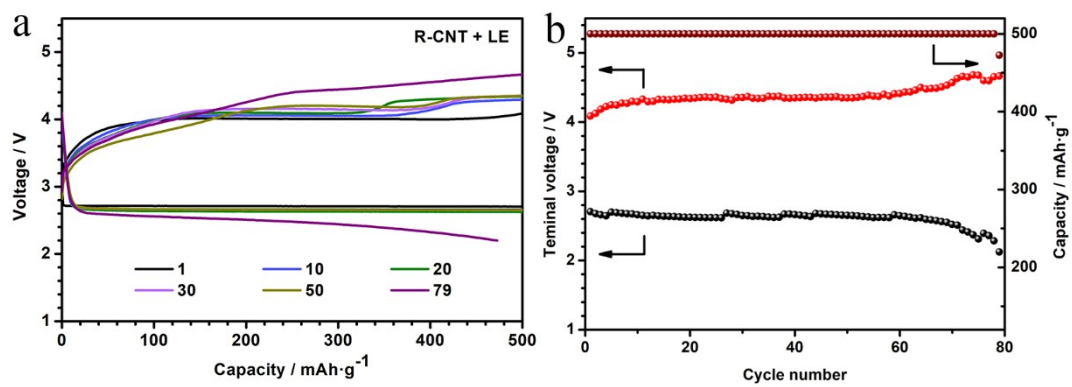

**Fig. S6** (a) The discharge-charge curves of Li-O<sub>2</sub> batteries with R-CNT + LE; (b) Profiles of discharge and charge terminal voltages and discharge capacity against cycle number. Current density = 100 mA g<sup>-1</sup>.

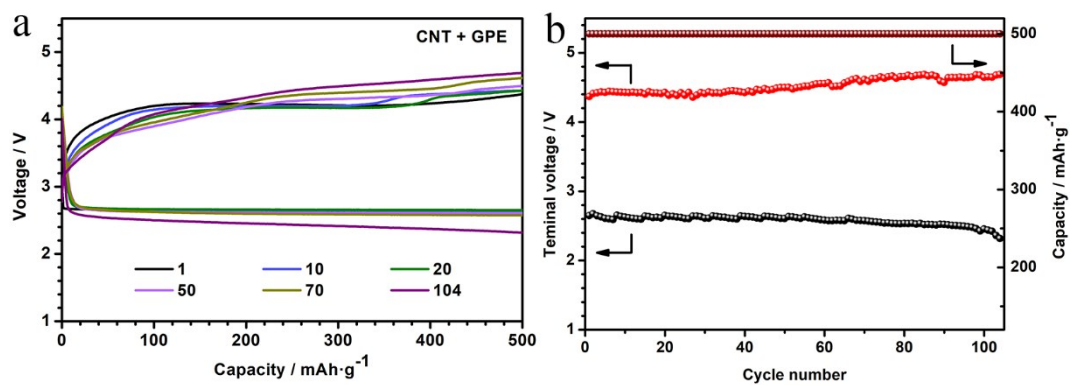

**Fig. S7** (a) The discharge-charge curves of Li-O<sub>2</sub> batteries with CNT + GPE; (b) Profiles of discharge and charge terminal voltages and discharge capacity against cycle number. Current density = 100 mA g<sup>-1</sup>.
